# Supplementary material for: An Amish founder mutation disrupts a PI(3)P-WHAMM-Arp2/3 complex–driven autophagosomal remodeling pathway
Source: PubMed Central journal article supplement — Mol Biol Cell. 2017 Sep 15;28(19):2492–507. doi: 10.1091/mbc.E17-01-0022 (PMC5597322; doi:10.1091/mbc.e17-01-0022), 2017-09-15
Supplement: supp_E17-01-0022v1_CombinedSupMats.pdf [file supp_E17-01-0022v1_CombinedSupMats.pdf]

# Supplemental Materials

*Molecular Biology of the Cell*

Mathiowetz et al.

## SUPPLEMENTAL MATERIAL

**TABLE S1. KEY REAGENTS.**

| REAGENT                           | SOURCE                    | CATALOG #       |
|-----------------------------------|---------------------------|-----------------|
| <u>Antibodies and Probes</u>      |                           |                 |
| Rabbit anti-WHAMM(WT)             | Shen et al., 2012         | N/A             |
| Chicken anti-WHAMM(WCA)           | Campellone et al., 2008   | N/A             |
| Guinea Pig anti-WHAMM(CC)         | Campellone et al., 2008   | N/A             |
| Rabbit anti-MBP                   | Shen et al., 2012         | N/A             |
| Rabbit anti-GFP                   | Campellone et al., 2008   | N/A             |
| Mouse anti-Tubulin                | Iowa DHSB                 | Cat.# E7-C      |
| Mouse anti-ERGIC-53               | Alexis Biochemicals       | discontinued    |
| Rabbit anti-LC3A                  | Cell Signaling Technology | Cat.# 4599      |
| Rabbit anti-LC3B                  | Cell Signaling Technology | Cat.# 3868      |
| Rabbit anti-WDR73                 | Santa Cruz Biotechnology  | Cat.# sc-137933 |
| Mouse anti-GAPDH                  | Ambion                    | Cat.# AM4300    |
| Mouse anti-Ubiquitin FK2          | Enzo Life Sciences        | Cat.# PW8810    |
| Rat anti-GRP94                    | Novus Biologicals         | Cat.# 300-619   |
| Mouse anti-SEC31A                 | BD Biosciences            | Cat.# 612350    |
| Mouse anti-GM130                  | BD Biosciences            | Cat.# 610822    |
| Mouse anti-LAMP1                  | Santa Cruz Biotechnology  | Cat.# sc-18821  |
| Mouse anti-HA.11                  | Covance                   | Cat.# 901502    |
| Alexa555 goat anti-mouse IgG      | Life Technologies         | Cat.# A21424    |
| Alexa555 goat anti-rabbit IgG     | Life Technologies         | Cat.# A21429    |
| Alexa488 goat anti-rat IgG        | Life Technologies         | Cat.# A11006    |
| Alexa488 goat anti-guinea pig IgG | Life Technologies         | Cat.# A11073    |
| IRDye800CW donkey anti-mouse      | LI-COR                    | Cat.# 926-32212 |
| IRDye800CW donkey anti-rabbit     | LI-COR                    | Cat.# 926-32213 |

|                                                                                  |                                         |                 |
|----------------------------------------------------------------------------------|-----------------------------------------|-----------------|
| IRDye800CW donkey anti-chicken                                                   | LI-COR                                  | Cat.# 926-32218 |
| HRP sheep anti-mouse IgG                                                         | GE Healthcare                           | Cat.# NXA931    |
| HRP donkey anti-rabbit IgG                                                       | GE Healthcare                           | Cat.# NA934V    |
| HRP donkey anti-chicken IgY                                                      | Jackson ImmunoResearch                  | Cat.#703035155  |
| Alexa488-Phalloidin                                                              | Life Technologies                       | Cat.# A12379    |
| Alexa647-Phalloidin                                                              | Life Technologies                       | Cat.# A22287    |
| Alexa488-Streptavidin                                                            | Life Technologies                       | Cat.# S32354    |
| <u>Clinical Samples</u>                                                          |                                         |                 |
| Human: Amish Lymphoblastoid Cell Lines (7 patients)                              | This paper                              | N/A             |
| Human: Amish Primary Fibroblasts (4 patients)                                    | This paper                              | N/A             |
| <u>Recombinant Proteins</u>                                                      |                                         |                 |
| MBP-WHAMM(WT) protein                                                            | Shen et al., 2012                       | N/A             |
| MBP-WHAMM( $\Delta$ 7) protein                                                   | This paper                              | N/A             |
| MBP-WHAMM(X6) protein                                                            | This paper                              | N/A             |
| MBP protein                                                                      | Shen et al., 2012                       | N/A             |
| MBP-WHAMM(WMD) protein                                                           | Shen et al., 2012                       | N/A             |
| MBP-WMD(WT) protein (codon optimized)                                            | This paper                              | N/A             |
| MBP-WMD(RF/AA) protein (codon optimized)                                         | This paper                              | N/A             |
| GST-Rab1 protein                                                                 | Russo et al., 2016                      | N/A             |
| GST protein                                                                      | Russo et al., 2016                      | N/A             |
| <u>Cell Lines</u>                                                                |                                         |                 |
| Human: HAP1 cells (mostly haploid parental cell line for eHAP cells)             | Haplogen (now Horizon Genomics)         | Cat.# C631      |
| Human: eHAP cells (fully haploid parental cell line for WHAMM and WDR73 mutants) | Haplogen; (Essletzbichler et al., 2014) | N/A             |

|                                                                   |                                             |     |
|-------------------------------------------------------------------|---------------------------------------------|-----|
| Human: WHAMM <sup>MUT</sup> eHAP cells (10bp deletion in exon 2)  | Haplogen (now Horizon Genomics); This paper | N/A |
| Human: WDR73 <sup>MUT</sup> eHAP cells (10bp insertion in exon 1) | Haplogen (now Horizon Genomics); This paper | N/A |
| Monkey: Cos7 cells                                                | UC Berkeley Cell Culture Facility           | N/A |
| Human: HeLa cells                                                 | UC Berkeley Cell Culture Facility           | N/A |
| Mouse: NIH3T3 cells                                               | UC Berkeley Cell Culture Facility           | N/A |
| Mouse: NIH3T3 cells + LAP vector                                  | This paper                                  | N/A |
| Mouse: NIH3T3 cells + LAP-WHAMM(WT)                               | This paper                                  | N/A |
| Mouse: NIH3T3 cells + LAP-WHAMM( $\Delta$ 7)                      | This paper                                  | N/A |
| Spodoptera: Sf9 cells                                             | Expression Systems, Davis CA                | N/A |
|                                                                   |                                             |     |
| <u>Recombinant DNA</u>                                            |                                             |     |
| pHA vector (pHM6)                                                 | Roche                                       | N/A |
| pHA-WHAMM(WT)                                                     | Campellone et al., 2008                     | N/A |
| pHA-WHAMM( $\Delta$ 7)                                            | This paper                                  | N/A |
| pHA-WHAMM(X6)                                                     | This paper                                  | N/A |
| pKC-LAP-C1 (His-GFP-TEV-S) vector                                 | Campellone et al., 2008                     | N/A |
| pKC-LAP-WHAMM(WT)                                                 | Campellone et al., 2008                     | N/A |
| pKC-LAP-WHAMM( $\Delta$ 7)                                        | This paper                                  | N/A |
| pKC-LAP-WHAMM(X6)                                                 | This paper                                  | N/A |
| pKC-mCherry-WHAMM(WT)                                             | Campellone et al., 2008                     | N/A |
| pKC-mCherry-WHAMM(X6)                                             | This paper                                  | N/A |
| pKC-EGFP-C1                                                       | Campellone et al., 2008                     | N/A |
| pKC-EGFP-WHAMM(WT)                                                | Campellone et al., 2008                     | N/A |
| pKC-EGFP-WDR73(WT)                                                | This paper                                  | N/A |

|                                              |                    |                |
|----------------------------------------------|--------------------|----------------|
| pKC-EGFP-WMD(WT) (codon optimized)           | This paper         | N/A            |
| pKC-EGFP-WMD(RF/AA) (codon optimized)        | This paper         | N/A            |
| pGFP-DFCP1                                   | Addgene            | Cat.# 38269    |
| pKC-FastBac-MBP                              | Shen et al., 2012  | N/A            |
| pKC-FastBac-MBP-WHAMM(WT)                    | Shen et al., 2012  | N/A            |
| pKC-FastBac-MBP-WHAMM( $\Delta$ 7)           | This paper         | N/A            |
| pKC-FastBac-MBP-WHAMM(X6)                    | This paper         | N/A            |
| pKC-FastBac-MBP-WHAMM(WMD)                   | Shen et al., 2012  | N/A            |
| pKC-FastBac-GST                              | Russo et al., 2016 | N/A            |
| pKC-FastBac-GST-Rab1                         | Russo et al., 2016 | N/A            |
| pKC-FastBac-MBP-WMD(WT) (codon optimized)    | This paper         | N/A            |
| pKC-FastBac-MBP-WMD(RF/AA) (codon optimized) | This paper         | N/A            |
| Bacmid-MBP                                   | Shen et al., 2012  | N/A            |
| Bacmid-MBP-WHAMM(WT)                         | Shen et al., 2012  | N/A            |
| Bacmid-MBP-WHAMM( $\Delta$ 7)                | This paper         | N/A            |
| Bacmid-MBP-WHAMM(X6)                         | This paper         | N/A            |
| Bacmid-MBP-WHAMM(WMD)                        | Shen et al., 2012  | N/A            |
| Bacmid-GST                                   | Russo et al., 2016 | N/A            |
| Bacmid-GST-Rab1                              | Russo et al., 2016 | N/A            |
| Bacmid-MBP-WMD(WT) (codon optimized)         | This paper         | N/A            |
| Bacmid-MBP-WMD(RF/AA) (codon optimized)      | This paper         | N/A            |
|                                              |                    |                |
| <u>Sequence-Based Reagents</u>               |                    |                |
| Human WHAMM (Gene ID: 123720)                | N/A                | N/A            |
| Human WDR73 (Gene ID: 84942)                 | N/A                | N/A            |
| Negative: siControl                          | Invitrogen         | Cat.# 4390843  |
| Negative: siControl                          | Invitrogen         | Cat.# 12935300 |

|                          |            |               |
|--------------------------|------------|---------------|
| Human/Mouse/Rat: siGAPDH | Invitrogen | Cat.# AM4624  |
| Human: siWHAMM #1        | Invitrogen | ID# HSS151263 |
| Human: siWHAMM #2        | Invitrogen | ID# HSS151264 |
| Human: siWHAMM #3        | Invitrogen | ID# HSS151265 |
| Human: siWDR73 #1        | Invitrogen | ID# HSS131519 |
| Human: siWDR73 #2        | Invitrogen | ID# HSS189285 |
| Human: siWDR73 #3        | Invitrogen | ID# HSS189286 |
|                          |            |               |

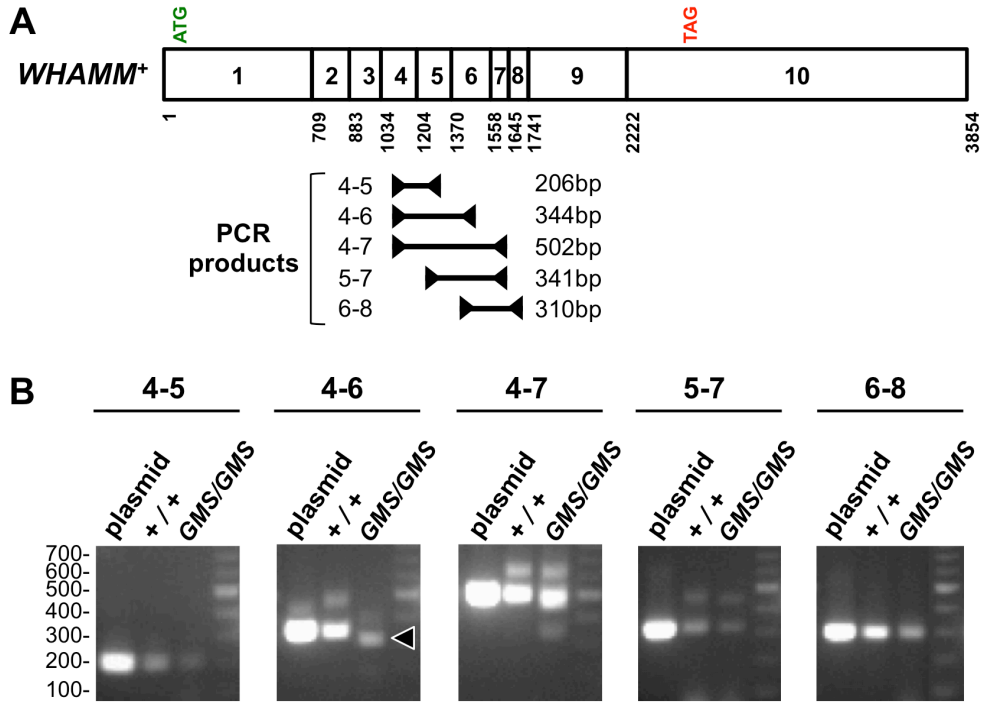

**Figure S1. Amish GMS patient fibroblasts express multiple WHAMM mRNA species and predicted proteins.**

**A.** A diagram of the exon organization in wild type *WHAMM* cDNA is shown. The nucleotide numbers at exon junctions are indicated. Start and stop codons are depicted in green and red, respectively. PCR product sizes spanning the indicated exons are also shown in base pairs.

**B.** RNA was isolated from normal (+/+) or GMS patient (*GMS/GMS*) fibroblasts, reverse transcribed, and subjected to PCR with primers specific to the indicated exons of *WHAMM*. A plasmid encoding wild type *WHAMM* was used as a positive control. The arrowhead highlights the position of a smaller-than-expected product that was amplified using primers in exons 4 and 6. Sequencing revealed that this product contained cryptic exon X6.

**C**

|    |                                                                         |     |
|----|-------------------------------------------------------------------------|-----|
| WT | MEDEQDPSLEGWVPVREGLFAEPEERHRLRFLVAWNGAEGKFVAVTCHDRTAQQRRLREGAR          | 60  |
| D7 | MEDEQDPSLEGWVPVREGLFAEPEERHRLRFLVAWNGAEGKFVAVTCHDRTAQQRRLREGAR          | 60  |
| X6 | MEDEQDPSLEGWVPVREGLFAEPEERHRLRFLVAWNGAEGKFVAVTCHDRTAQQRRLREGAR<br>***** | 60  |
| WT | LGPEPEPKPEAAVSPSSWAGLLSAAGLRGAHRQLAALWPPLERCFPRLPPELDVGGGGAW            | 120 |
| D7 | LGPEPEPKPEAAVSPSSWAGLLSAAGLRGAHRQLAALWPPLERCFPRLPPELDVGGGGAW            | 120 |
| X6 | LGPEPEPKPEAAVSPSSWAGLLSAAGLRGAHRQLAALWPPLERCFPRLPPELDVGGGGAW<br>*****   | 120 |
| WT | GLGLGLWALLWPTRAGPGEAALQELCGQLERYLGAADGCGGATVRDALFPAEGGAADCE             | 180 |
| D7 | GLGLGLWALLWPTRAGPGEAALQELCGQLERYLGAADGCGGATVRDALFPAEGGAADCE             | 180 |
| X6 | GLGLGLWALLWPTRAGPGEAALQELCGQLERYLGAADGCGGATVRDALFPAEGGAADCE<br>*****    | 180 |
| WT | SPREFRERALARWVEADARLRQVIQGHGKANTMVALMNVYQEEDEAYQELVTVATMFFQ             | 240 |
| D7 | SPREFRERALARWVEADARLRQVIQGHGKANTMVALMNVYQEEDEAYQELVTVATMFFQ             | 240 |
| X6 | SPREFRERALARWVEADARLRQVIQGHGKANTMVALMNVYQEEDEAYQELVTVATMFFQ<br>*****    | 240 |
| WT | YLLQPFPRAMREVATLCKLDILKSLDEDDLGP RRVVALEKEAEEWTRRAEEAVVSIQDITV          | 300 |
| D7 | YLLQPFPRAMREVATLCKLDILKSLDEDDLGP RRVVALEKEAEEWTRRAEEAVVSIQDITV          | 300 |
| X6 | YLLQPFPRAMREVATLCKLDILKSLDEDDLGP RRVVALEKEAEEWTRRAEEAVVSIQDITV<br>***** | 300 |
| WT | NYFKETVKALAGMQKEME QDAKRFQAAWATAIPRLEKQLMLARETLQLMRAKELCLNH             | 360 |
| D7 | NYFKETVKALAGMQKEME QDAKRFQAAWATAIPRLEKQLMLARETLQLMRAKELCLNH             | 360 |
| X6 | NYFKETVKALAGMQKEME QDAKRFQAAWATAIPRLEKQLMLARETLQLMRAKELCLNH<br>*****    | 360 |
| WT | KRAEIQQKMEDLPEQKNTNVVDELEIQFYEIQLELYEVKFEILKNEEILLTTQLDSLKR             | 420 |
| D7 | KRAEIQQKMEDLPEQKNTNVVDELEIQFYEIQLELYEVKFEILKNEEILLTTQLDSLKR             | 420 |
| X6 | KRAEIQQKMKFRKFKTKTRWN-----FDCEFA-----<br>***** : : : . * . : : . *      | 388 |
| WT | LIKEKQDEVVYDPCENPEELKVIDCVVGLQDDKNLEVKELRRQCQQLSKRGRICAKRA              | 480 |
| D7 | LKNMKLSITIHV-----KIQRNLKSLTVWVWGRMIRIWK-----                            | 455 |
| X6 | -----<br>-----<br>-----                                                 | 388 |
| WT | SLRSRKDQCKENHRFLRQQAEESIRYSRQHHSIQMKRDKIKEEQQKKKEWINQERQKTLQ            | 540 |
| D7 | -----                                                                   | 455 |
| X6 | -----<br>-----                                                          | 388 |
| WT | RLRSFKDKRLAQSVRNTSGSEPVAPNLPDLSQQMCLPASHAVSVIHPSSRKTTRGVPLSE            | 600 |
| D7 | -----                                                                   | 455 |
| X6 | -----<br>-----                                                          | 388 |
| WT | AGNVKSPKCQCHGNIPVQVFVVDQTHSKSSEELSLPPPPPPPPPPPPPPPPPPPLR                | 660 |
| D7 | -----                                                                   | 455 |
| X6 | -----<br>-----                                                          | 388 |
| WT | ALSSSSQAATHQNLGFRAPVKDDQPRPLVCESPAERPRDSLESFSCPGSMDEVLASLRHG            | 720 |
| D7 | -----                                                                   | 455 |
| X6 | -----<br>-----                                                          | 388 |
| WT | RAPLRKVEVPVRPPHASINEHILAIRQGVLKLVHPDLGPNPSSKPTSNRRTSDLERS               | 780 |
| D7 | -----                                                                   | 455 |
| X6 | -----<br>-----                                                          | 388 |
| WT | IKAALQRIKRVSADEEDSDEQDPGQWDG                                            | 809 |
| D7 | -----                                                                   | 455 |
| X6 | -----                                                                   | 388 |

**Figure S1 (cont.). Amish *GMS* patient fibroblasts express multiple *WHAMM* mRNA species and predicted proteins.**

**C.** A Clustal Omega alignment of the proteins encoded by the *WHAMM*<sup>+</sup> (“WT”), *WHAMM*<sup>*GMS*</sup>Δ7 (“D7”), and *WHAMM*<sup>*GMS*</sup>X6 (“X6”) transcripts is shown.



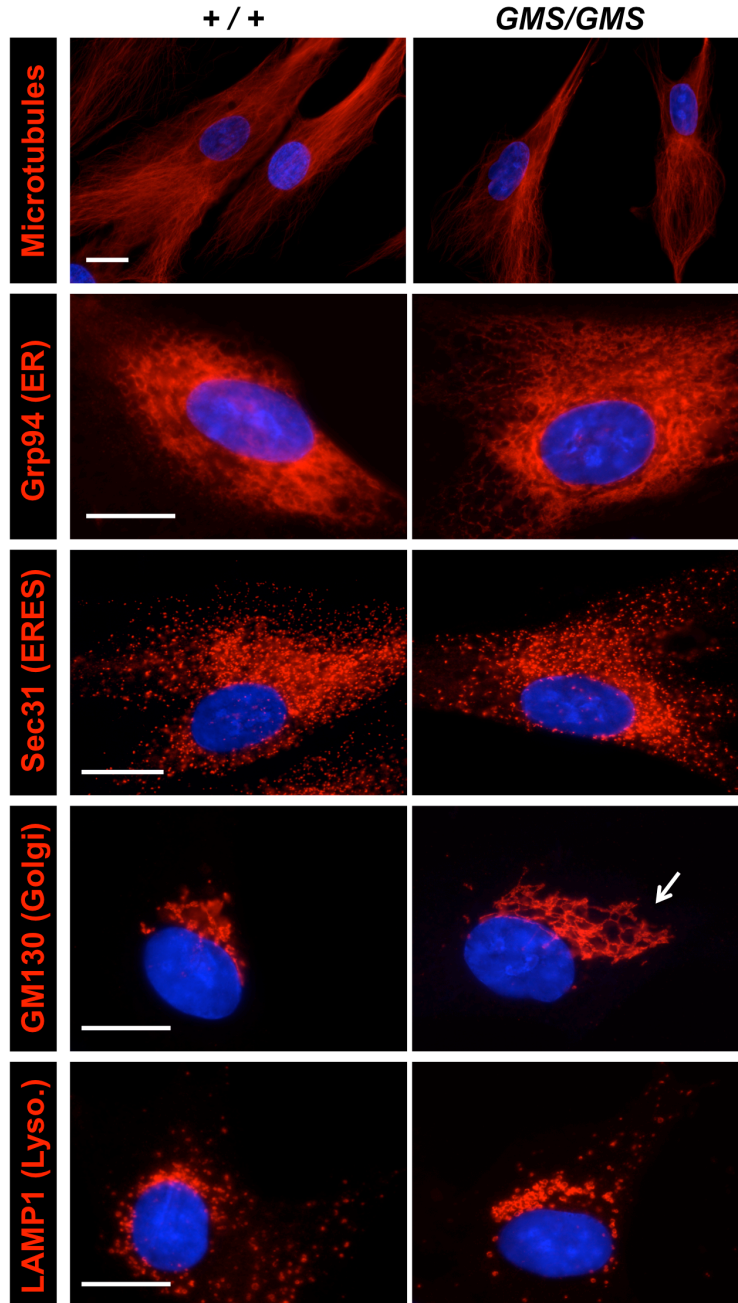

**Figure S2. Amish GMS patient fibroblasts have an enlarged *cis*-Golgi compartment in a predominantly organized cytoplasm.**

Wild type (+/+) or GMS patient (*GMS/GMS*) fibroblasts were fixed and stained with antibodies to visualize microtubules, the endoplasmic reticulum (ER), ER exit sites (ERES), the *cis*-Golgi, or lysosomes (each in red). DAPI-stained nuclei are shown in blue. Scale bars = 10 $\mu$ m. The arrow indicates a larger-than-normal Golgi.

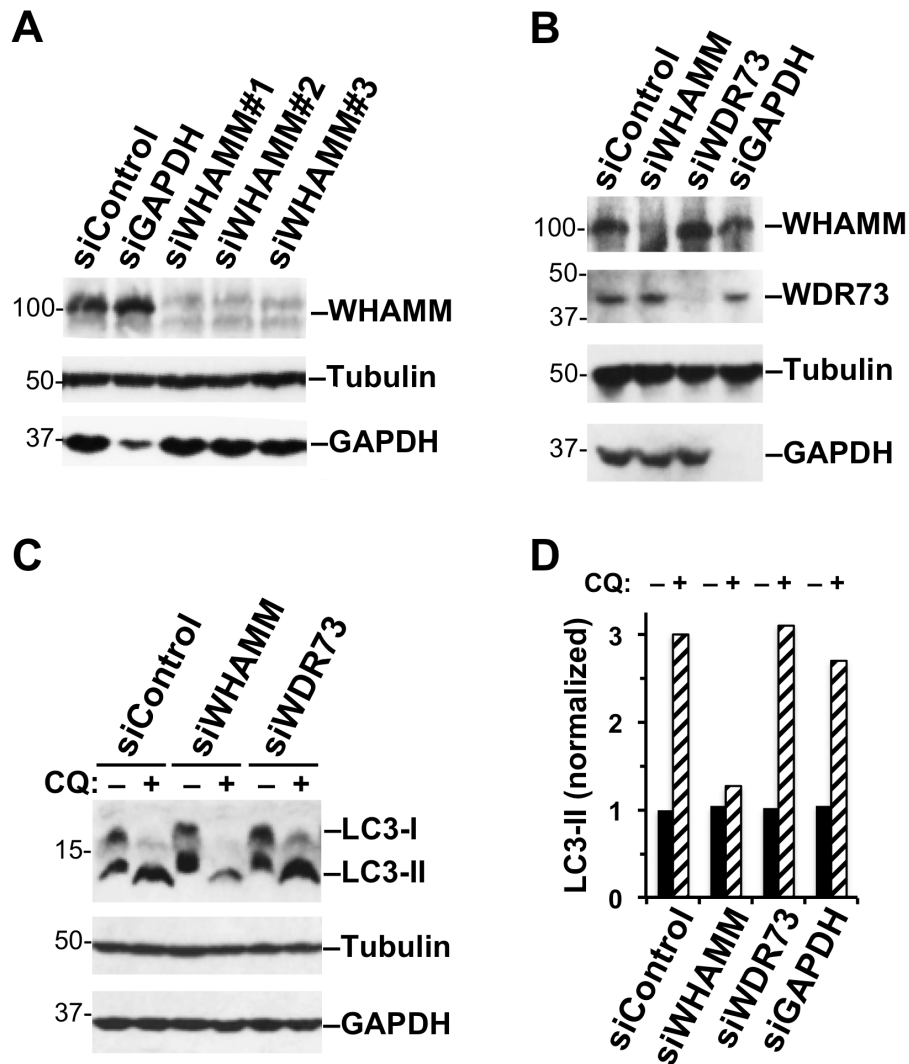

**Figure S3. HeLa cells depleted of WHAMM exhibit less LC3 conversion.**

**A.** HeLa cells were treated with control, GAPDH, or 3 independent WHAMM siRNAs and tested for protein knockdown by immunoblotting for WHAMM, Tubulin, and GAPDH. **B.** HeLa cells were treated with a control, 3 WHAMM, 3 WDR73, or a GAPDH siRNA and analyzed by immunoblotting for WHAMM, WDR73, Tubulin, and GAPDH. **C.** HeLa cells treated with siRNAs were grown in rich media (CQ -) or were starved for 90 min and treated with chloroquine (CQ +) prior to immunoblotting for LC3B, Tubulin, and GAPDH. The positions of the non-lipidated (LC3-I) and lipidated (LC3-II) forms of LC3B are indicated. **D.** The amount of LC3B in its mature LC3-II form was quantified by measuring band intensities on a representative immunoblot. Protein content in each lane was normalized to Tubulin staining, and the relative levels of LC3-II were calculated.

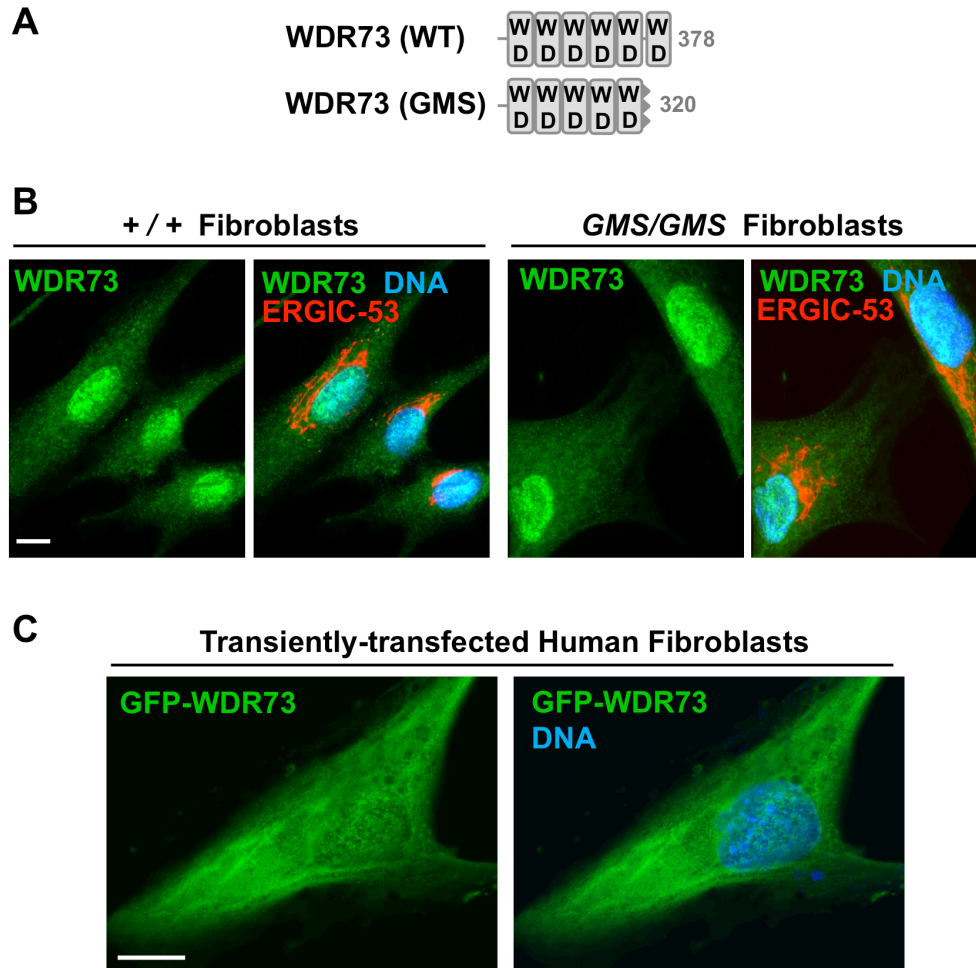

**Figure S4. WDR73 exhibits a nucleo-cytoplasmic localization in interphase cells.**

**A.** The 378-residue WDR73(WT) protein and 320-residue truncated Amish GMS variant (Jinks et al., 2015) are diagrammed.

**B.** Wild type (+/+) or Amish GMS patient (*GMS/GMS*) fibroblasts were fixed and stained with antibodies to detect WDR73 (green) or ERGIC-53 (red) and with DAPI to label DNA (blue). A nucleo-cytoplasmic localization of WDR73 was detected in both cell lines. Similar results were observed using two different commercially-available WDR73 antibodies. Scale bar = 10 $\mu$ m.

**C.** Normal fibroblasts were transfected with a plasmid encoding GFP-WDR73(WT), fixed, and stained with DAPI to label DNA (blue). GFP-WDR73 exhibited a diffuse nucleo-cytoplasmic localization. Scale bar = 10 $\mu$ m.



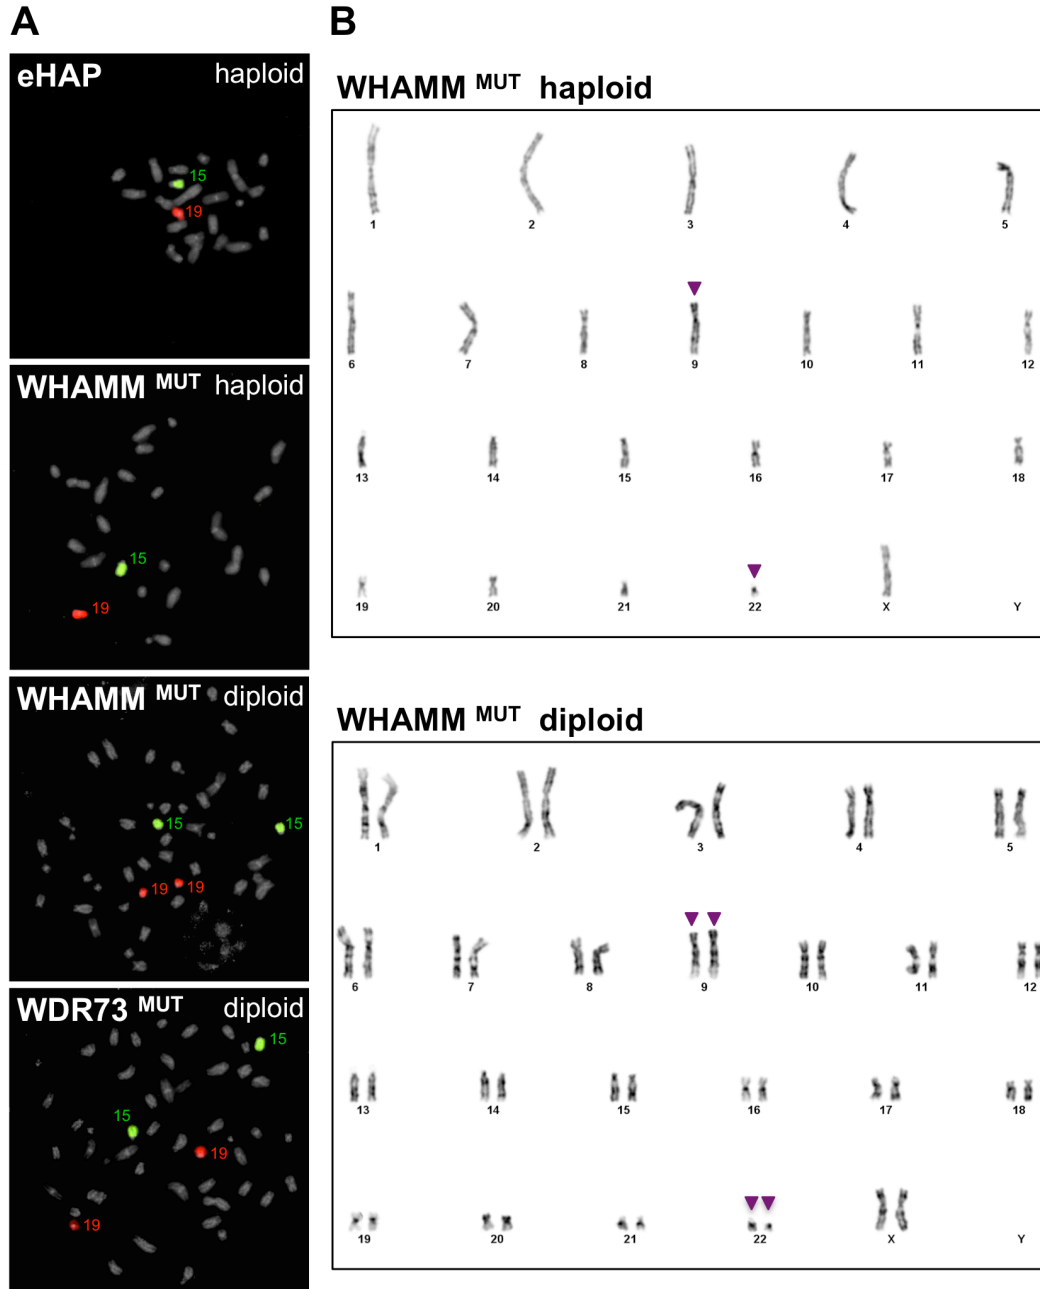

**Figure S6. CRISPR-engineered cell lines have the expected karyotypes.**

**A.** DAPI-stained chromosome spreads were treated with fluorescence *in situ* hybridization (FISH) probes for Chromosome 15 (green) and Chromosome 19 (red) to confirm that all cell lines were derived from a fully-haploid eHAP clone (Essletzbichler et al., 2014) and not the nearly-haploid HAP1 line (Carette et al., 2011). Nevertheless, eHAP, WHAMM<sup>MUT</sup>, and WDR73<sup>MUT</sup> cell lines each revert to autozygous diploidy over time. Representative examples of haploid and diploid spreads are shown. All spreads for eHAP, WHAMM<sup>MUT</sup>, and WDR73<sup>MUT</sup> contained normal copies of Chromosomes 15 and 19, irrespective of haploidy or diploidy.

**B.** Representative karyograms of G-banded WHAMM<sup>MUT</sup> cells are shown with the expected translocation between chromosomes 9 and 22 (purple arrows) in both haploid and diploid cells. The t(9;22) was also observed with eHAP and WDR73<sup>MUT</sup> cells irrespective of ploidy.
